# Supplementary material
Source: PubMed Central journal article supplement (PMC8898573)
Supplement: NIHMS1780673-supplement-Supp1.pdf [file NIHMS1780673-supplement-Supp1.pdf]

## Supplemental Tables

**Supplemental Table 1: Health symptom keyword categorization scheme**

| <b>Health Category</b> | <b>Keywords</b>                                                                                                                                                                                                                                                                                                                 |
|------------------------|---------------------------------------------------------------------------------------------------------------------------------------------------------------------------------------------------------------------------------------------------------------------------------------------------------------------------------|
| <b>Cardiovascular</b>  | heart, cholesterol, stroke, chest pain, blood pressure, heart attack, cardiovascular disease, blood clots, heart rate                                                                                                                                                                                                           |
| <b>Respiratory</b>     | wheezing, cough (coughing, coughed, coughs), copd, emphysema, asthma (asthmatic), respiratory, lung (lungs), shortness of breath, dry cough, chronic bronchitis, wet lung, popcorn lung, acute bronchitis, pneumonia, sleep apnea                                                                                               |
| <b>Neurological</b>    | seizure (seizures), headache, dizzy (dizziness), fatigue (fatigued), numb (numbness), tingle (tingling, tingles), sensitive (sensitivity)                                                                                                                                                                                       |
| <b>Cancer</b>          | cancer, lung cancer, mouth cancer, liver cancer, colon cancer, throat cancer                                                                                                                                                                                                                                                    |
| <b>Psychological</b>   | depression (depressed), irritable, stress, anxiety, adhd                                                                                                                                                                                                                                                                        |
| <b>Mouth</b>           | teeth, tongue, periodontal, toothache, mouth pain, oral health, tooth decay, gum disease, gingivitis, dry mouth, vaper's tongue, lips, gums, dry socket, cavities                                                                                                                                                               |
| <b>Throat</b>          | esophagus, throat, throat hit                                                                                                                                                                                                                                                                                                   |
| <b>Digestive</b>       | digestive, stomach, stomachache, heartburn, eating disorder, vomit (vomiting, vomited, puking, puke), diarrhea                                                                                                                                                                                                                  |
| <b>Other</b>           | nausea (nauseous, nauseated), lightheaded (light-headed), kidney (kidneys), bladder, colon, liver, skin, diabetes, ulcer (ulcers), arthritis, aching, dehydrate (dehydrates, dehydrated, dehydration), hurt (hurting, hurts), irritate (irritates, irritated, irritation), inflammation, stamina, sinus (sinuses), phlegm, acne |

**Supplemental Table 2: Frequency of JUUL flavor mentions on Reddit**

| <b>Flavors</b>          | <b># of Posts</b> |
|-------------------------|-------------------|
| <b>Mango</b>            | 2,684             |
| <b>Mint</b>             | 2,148             |
| <b>Fruit</b>            | 720               |
| <b>Menthol</b>          | 974               |
| <b>Cucumber</b>         | 477               |
| <b>Crème</b>            | 525               |
| <b>Virginia Tobacco</b> | 318               |
| <b>Classic Tobacco</b>  | 107               |
